# Supplementary material for: Design of a multinuclear Zn(ii) complex as a new molecular probe for fluorescence imaging of His-tag fused proteins
Source: Royal Society of Chemistry journal article supplement (doi:10.1039/c1cc16263b), 2011-11-16
Supplement: c1cc16263b.pdf [file c1cc16263b.pdf]

1 Supplementary Information for:

2

3 **Design of Multinuclear Zn(II) Complex as New Molecular Probe for**  
4 **Fluorescence Imaging of His-tag Fused Proteins**

5

6 Sho-hei Fujishima,<sup>1</sup> Hiroshi Nonaka,<sup>1</sup> Sho-hei Uchinomiya,<sup>1</sup> Yoshiyuki Alex. Kawase,<sup>1</sup>  
7 Akio Ojida<sup>2</sup> and Itaru Hamachi<sup>1</sup>

8

9 <sup>1</sup>*Department of Synthetic Chemistry and Biological Chemistry, Graduate School of Engineering,*  
10 *Kyoto University, Katsura campus, Kyoto, 615-8510, Japan.*

11 <sup>2</sup>*Graduate School of Pharmaceutical Sciences, Kyushu University, 3-1-1, Maidashi, Higashi-ku,*  
12 *Fukuoka, 812-8582, Japan.*

13 E-mail: [ihamachi@sbchem.kyoto-u.ac.jp](mailto:ihamachi@sbchem.kyoto-u.ac.jp)

14

15

## 1 Supplementary Figures

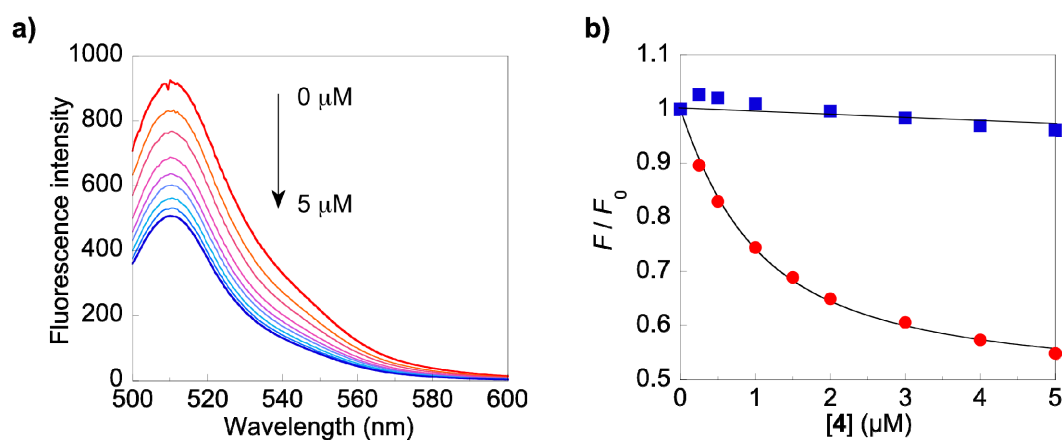

2

3 **Fig. S1** (a) Fluorescence spectral change of the EGFP tethered with a His10 tag (His10-EGFP,  
4 0.5 μM) upon addition of 4 (0-5 μM). (b) Plots of the fluorescence emission change at 510 nm  
5 observed in the titration of His10-EGFP (●) or EGFP lacking a His10 tag (■) with 4.  
6 Fluorescence titration curve was analyzed using nonlinear least-square curve-fitting assuming  
7 1:1 binding to evaluate the apparent binding constant. Measurement conditions: 50 mM HEPES  
8 (pH 7.2), 100 mM NaCl, 25 °C.

9

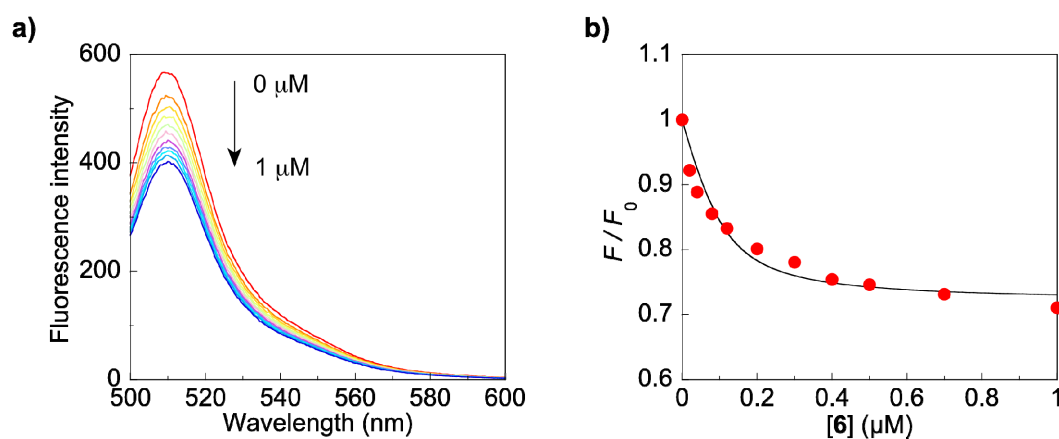

1

2 **Fig. S2** (a) Fluorescence spectral change of the EGFP tethered with a His10 tag (His10-EGFP,  
3 0.1 μM) upon addition of **6** (0-1 μM) in the presence of 10 μM of Zn(II)-Ida dimer **28** as a  
4 competitive binder (see **Supplementary Methods**). (b) Curve-fitting analysis of the  
5 fluorescence emission change at 510 nm.<sup>S1</sup> Measurement conditions: 50 mM HEPES (pH  
6 7.2), 100 mM NaCl, 25 °C.

7

8

## 1 **Supplementary Methods**

2

### 3 **General materials and methods for organic synthesis**

4 All chemical reagents and solvents were obtained from commercial suppliers (Aldrich,  
5 Tokyo Chemical Industry (TCI), Wako Pure Chemical Industries, Acros Organics, Sasaki  
6 Chemical, or Watanabe Chemical Industries) and used without further purification.

7 Thin layer chromatography (TLC) was performed on silica gel 60 F<sub>254</sub> precoated aluminium  
8 sheets (Merck) and visualized by fluorescence quenching or ninhydrin staining.  
9 Chromatographic purification was conducted by flash column chromatography on silica gel 60  
10 N (neutral, 40–50 µm, Kanto Chemical). <sup>1</sup>H NMR spectra were recorded in deuterated solvents  
11 on a Varian Mercury 400 (400 MHz) spectrometer and calibrated to the residual solvent peak or  
12 tetramethylsilane (= 0 ppm). Multiplicities are abbreviated as follows: s = singlet, d = doublet, t  
13 = triplet, q = quartet, quin = quintet, m = multiplet, dd = double doublet. Matrix-assisted laser  
14 desorption/ionization time-of-flight mass spectroscopy (MALDI-TOF MS) was measured by an  
15 Autoflex II instrument (Bruker Daltonics) using α-cyano-4-hydroxycinnamic acid (CHCA) or  
16 sinapinic acid as the matrix. High-resolution electrospray ionization quadrupole fourier  
17 transform mass spectroscopy (HR-ESI Qq-LTMS) was measured by a Bruker apex-ultra (7T)  
18 mass spectrometer. We acknowledge Dr. Keiko Kuwata (Graduate School of Engineering, Kyoto  
19 University) for the measurements of the high-resolution mass spectroscopy.

20

## 1 Synthesis of 1

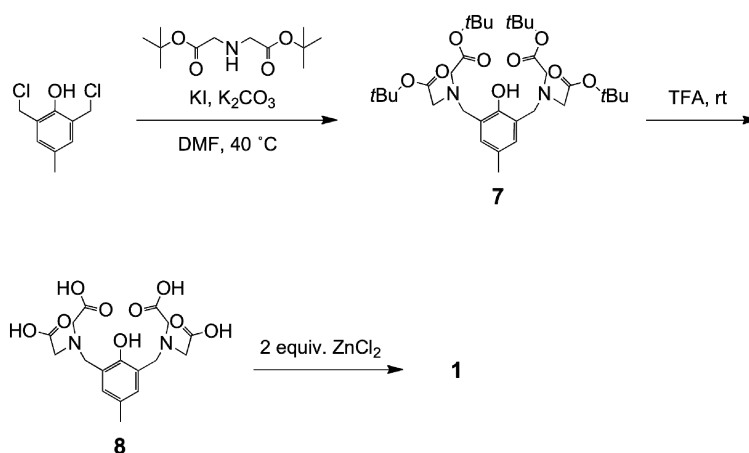

2

### 3 Compound 7

4 A solution of 2,6-bis(chloromethyl)-*p*-cresol (50 mg, 241 μmol), di-*tert*-butyl  
5 iminodiacetate (130 mg, 530 μmol), potassium carbonate (74 mg, 530 μmol) and potassium  
6 iodide (16 mg, 96 μmol) in dry DMF (5 mL) was stirred for 3 h at 40 °C. After removal of  
7 the solvent by evaporation, the residue was diluted with CHCl<sub>3</sub>. The organic layer was  
8 washed with *sat.* NaHCO<sub>3</sub> and brine followed by drying over Na<sub>2</sub>SO<sub>4</sub>. After removal of the  
9 solvent by evaporation, the residue was purified by flash column chromatography on SiO<sub>2</sub>  
10 (Hexane : AcOEt = 8 : 1) to give 7 (53 mg, 35%) as a colorless oil. <sup>1</sup>H-NMR (400 MHz,  
11 CDCl<sub>3</sub>) δ 9.23 (s, 1H), 6.95 (s, 2H), 3.91 (s, 4H), 3.42 (s, 8H), 2.22 (s, 3H), 1.47 (s, 36H).

12

### 13 Compound 8

14 A solution of 7 (53 mg, 85 μmol) in TFA (3 mL) was stirred for 4 h at rt. The solvent  
15 was removed to give 8 (59 mg, quant.) as a white powder. <sup>1</sup>H-NMR (400 MHz, CD<sub>3</sub>OD) δ  
16 7.08 (s, 2H), 4.27 (s, 4H), 3.83 (s, 8H), 2.26 (s, 3H). HR-ESI MS *m/e* calcd for [M+H]<sup>+</sup>  
17 399.1398, found 399.1393.

18

### 19 Compound 1

1            A solution of **8** (28 mg, 70  $\mu\text{mol}$ ),  $\text{ZnCl}_2$  (140  $\mu\text{mol}$ ) in  $\text{H}_2\text{O}$  (1 mL) was stirred for 1 h at  
2    rt.    The solution was filtered through a cellulose acetate filter and then lyophilized.    The  
3    solid was filtered and washed with AcOEt followed by drying in vacuo at 40  $^\circ\text{C}$  to give **1** (33  
4    mg, 90%) as a white powder.  
5

## 1 Synthesis of 3

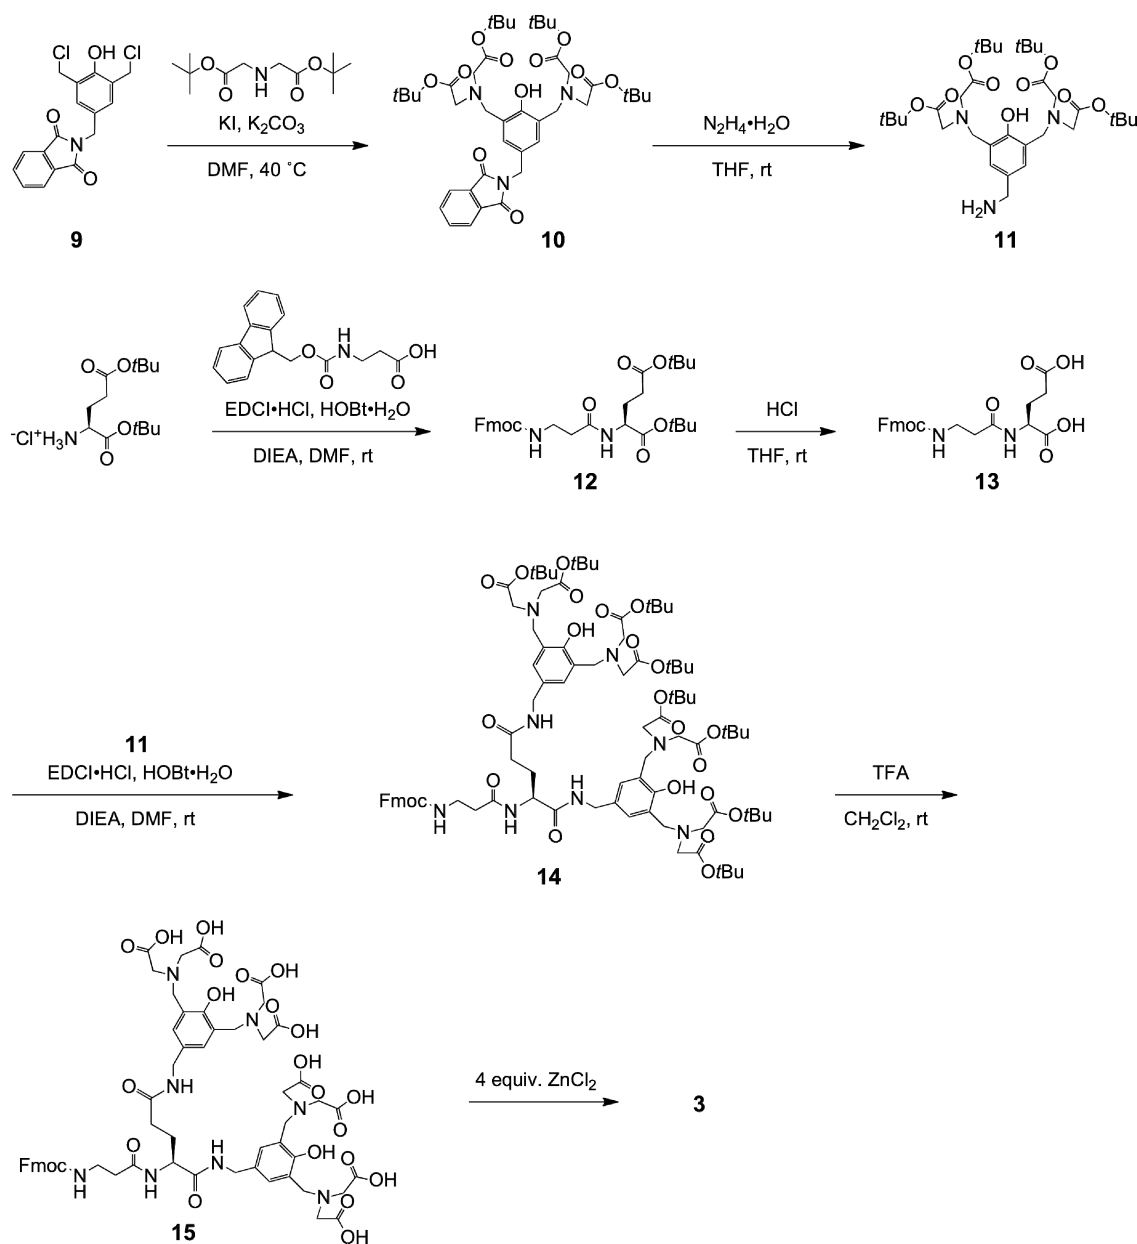

2

### 3 Compound 10

4 A solution of **9**<sup>S2</sup> (100 mg, 286 μmol), di-*tert*-butyl iminodiacetate (154 mg, 628 μmol),  
5 potassium carbonate (87 mg, 628 μmol) and potassium iodide (19 mg, 114 μmol) in dry DMF  
6 (5 mL) was stirred for 3 h at 40 °C. The solution was diluted with *sat.* NaHCO<sub>3</sub> and extracted  
7 with CHCl<sub>3</sub>. The organic layer was washed with brine followed by drying over Na<sub>2</sub>SO<sub>4</sub>.  
8 After removal of the solvent by evaporation, the residue was purified by flash column

1 chromatography on SiO<sub>2</sub> (Hexane : AcOEt = 4 : 1) to give **10** (124 mg, 57%) as a colorless oil.  
2 <sup>1</sup>H-NMR (400 MHz, CDCl<sub>3</sub>) δ 9.56 (s, 1H), 7.82 (d, *J* = 5.2 Hz, 2H), 7.68 (d, *J* = 5.2 Hz, 2H),  
3 7.19 (s, 2H), 4.73 (s, 2H), 3.91 (s, 4H), 3.41 (s, 8H), 1.45 (s, 36H). HR-ESI MS *m/e* calcd for  
4 [M+H]<sup>+</sup> 768.4066, found 768.4058.

5

#### 6 Compound **11**

7 A solution of **10** (81 mg, 106 μmol) in THF (5 mL) / hydrazine monohydrate (0.4 mL)  
8 was stirred for 21 h at rt. After addition of 2 N aqueous NaOH (10 mL), the reaction mixture  
9 was further stirred for 1.5 h at rt. The resultant mixture was extracted with CHCl<sub>3</sub> and the  
10 organic layer was washed with brine followed by drying over Na<sub>2</sub>SO<sub>4</sub>. After removal of the  
11 solvent by evaporation, the residue was purified by flash column chromatography on SiO<sub>2</sub>  
12 (CHCl<sub>3</sub> : MeOH : 25% aqueous NH<sub>3</sub> = 400 : 10 : 1) to give **11** (55 mg, 82%) as a pale-yellow  
13 oil. <sup>1</sup>H-NMR (400 MHz, CDCl<sub>3</sub>) δ 9.43 (s, 1H), 7.09 (s, 2H), 3.94 (s, 4H), 3.73 (s, 2H), 3.42  
14 (s, 8H), 1.47 (s, 36H). HR-ESI MS *m/e* calcd for [M+H]<sup>+</sup> 638.4011, found 638.4006.

15

#### 16 Compound **12**

17 A solution of H-Glu(*Or*Bu)-*Or*Bu•HCl (210 mg, 710 μmol), Fmoc-βAla-OH (265 mg,  
18 852 μmol), EDCI•HCl (191 mg, 995 μmol), HOBt•H<sub>2</sub>O (152 mg, 995 μmol) and DIEA (238 μL,  
19 1.42 mmol) in dry DMF (5 mL) was stirred for 15 h at rt. The reaction mixture was diluted  
20 with *sat.* NaHCO<sub>3</sub> and extracted with AcOEt. The organic layer was washed with water and  
21 brine followed by drying over Na<sub>2</sub>SO<sub>4</sub>. After removal of the solvent by evaporation, the  
22 residue was purified by flash column chromatography on SiO<sub>2</sub> (Hexane : AcOEt = 2 : 1) to give  
23 **12** (400 mg, quant.) as a white amorphous powder. <sup>1</sup>H-NMR (400 MHz, CDCl<sub>3</sub>) δ 7.76 (d, *J*  
24 = 7.6 Hz, 2H), 7.61 (d, *J* = 7.2 Hz, 2H), 7.40 (t, *J* = 7.6 Hz, 2H), 7.30 (t, *J* = 7.6 Hz, 2H), 6.29 (d,  
25 *J* = 8.0 Hz, 1H), 5.67 (t, *J* = 5.6 Hz, 1H), 4.45-4.51 (m, 1H), 4.36 (d, *J* = 7.2 Hz, 2H), 4.21 (t, *J*  
26 = 6.8 Hz, 1H), 3.52 (t, *J* = 6.0 Hz, 2H), 2.46 (t, *J* = 5.6 Hz, 2H), 2.22-2.38 (m, 2H), 2.09-2.17



1 (m, 1H), 1.88-1.97 (m, 1H), 1.48 (s, 9H), 1.44 (s, 9H). HR-ESI MS  $m/e$  calcd for  $[M+H]^+$   
2 553.2908, found 553.2909.

3

#### 4 Compound **13**

5 A solution of **12** (400 mg, 724  $\mu$ mol) in THF (5 mL) / 4 N aqueous HCl (5 mL) was  
6 stirred for 19 h at rt. After removal of the solvent by evaporation, the residue was dissolved  
7 in *sat.* NaHCO<sub>3</sub>. The aqueous layer was washed with AcOEt, acidified to pH 2 with 1 N  
8 aqueous HCl, and then extracted with AcOEt. The organic layer was dried over Na<sub>2</sub>SO<sub>4</sub> and  
9 concentrated by evaporation to give **13** (327 mg, quant.) as a white amorphous powder.  
10 <sup>1</sup>H-NMR (400 MHz, CD<sub>3</sub>OD)  $\delta$  7.78 (d,  $J$  = 7.2 Hz, 2H), 7.64 (d,  $J$  = 7.6 Hz, 2H), 7.38 (t,  $J$  =  
11 7.2 Hz, 2H), 7.30 (t,  $J$  = 7.2 Hz, 2H), 4.43 (q,  $J$  = 4.4 Hz, 1H), 4.31 (d,  $J$  = 7.2 Hz, 2H), 4.19 (t,  
12  $J$  = 6.8 Hz, 1H), 3.39 (t,  $J$  = 5.6 Hz, 2H), 2.45 (t,  $J$  = 6.8 Hz, 2H), 2.41 (t,  $J$  = 7.6 Hz, 2H),  
13 2.13-2.22 (m, 1H), 1.90-1.98 (m, 1H). HR-ESI MS  $m/e$  calcd for  $[M+Na]^+$  463.1476, found  
14 463.1476.

15

#### 16 Compound **14**

17 A solution of **13** (80 mg, 182  $\mu$ mol), **11** (244 mg, 382  $\mu$ mol), EDCI•HCl (98 mg, 510  
18  $\mu$ mol), HOBt•H<sub>2</sub>O (78 mg, 510  $\mu$ mol) and DIEA (123  $\mu$ L, 728  $\mu$ mol) in dry DMF (5 mL) was  
19 stirred for 20 h at rt. The reaction mixture was diluted with *sat.* NaHCO<sub>3</sub> and extracted with  
20 CHCl<sub>3</sub>. The organic layer was washed with *sat.* NaHCO<sub>3</sub>, brine and dried over Na<sub>2</sub>SO<sub>4</sub>  
21 followed by concentration in vacuo. The residue was purified by flash column  
22 chromatography on SiO<sub>2</sub> (CHCl<sub>3</sub> : MeOH = 30 : 1) to give **14** (116 mg, 38%) as a pale-yellow  
23 oil. <sup>1</sup>H-NMR (400 MHz, CDCl<sub>3</sub>)  $\delta$  9.59 (s, 1H), 9.56 (s, 1H), 7.75 (d,  $J$  = 7.2 Hz, 2H), 7.59  
24 (d,  $J$  = 7.2 Hz, 2H), 7.38 (t,  $J$  = 7.6 Hz, 2H), 7.30 (t,  $J$  = 7.6 Hz, 2H), 7.07 (s, 2H), 7.05 (s, 2H),  
25 6.18 (br s, 1H), 5.67 (br s, 1H), 4.19-4.46 (m, 8H), 3.90 (s, 4H), 3.89 (s, 4H), 3.49 (br s, 2H),  
26 3.40 (s, 8H), 3.39 (s, 8H), 2.48 (br s, 2H), 2.29-2.43 (m, 2H), 2.02-2.17 (m, 2H), 1.47 (s, 36H),

1 1.45 (s, 36H). HR-ESI MS  $m/e$  calcd for  $[M+H]^+$  1679.9322, found 1679.9328.

2

### 3 Compound **15**

4 A solution of **14** (25 mg, 14.9  $\mu$ mol) in  $\text{CH}_2\text{Cl}_2$  (1 mL) / TFA (1 mL) was stirred for 1 h at  
5 rt. After removal of the solvent by evaporation, the residue was purified by RP-HPLC  
6 (column: YMC-pack ODS-A, 250 x 25 mm, mobile phase;  $\text{CH}_3\text{CN}$  (containing 0.1% TFA) :  
7  $\text{H}_2\text{O}$  (containing 0.1% TFA) = 20 : 80 (0 min)  $\rightarrow$  40 : 60 (40 min), flow rate; 10 mL/min,  
8 detection; UV (220 nm)) to give **15** (11 mg, 60%) as a white powder.  $^1\text{H-NMR}$  (400 MHz,  
9  $\text{CD}_3\text{OD}$ )  $\delta$  7.78 (d,  $J = 7.2$  Hz, 2H), 7.59 (d,  $J = 6.4$  Hz, 2H), 7.37 (t,  $J = 7.2$  Hz, 2H), 7.28 (t,  $J$   
10 = 7.2 Hz, 2H), 7.14 (s, 4H), 4.10-4.36 (m, 16H), 3.79 (s, 8H), 3.78 (s, 8H), 3.41 (t,  $J = 6.8$  Hz,  
11 2H), 2.45 (t,  $J = 6.4$  Hz, 2H), 2.32 (t,  $J = 7.2$  Hz, 2H), 2.17 (m, 1H), 1.93 (m, 1H). HR-ESI  
12 MS  $m/e$  calcd for  $[M+H]^+$  1231.4314, found 1231.4279.

13

### 14 Compound **3**

15 A solution of **15** (200  $\mu$ M, determined by  $\epsilon(\mathbf{15})_{299\text{ nm}} = 7.63 \times 10^3 \text{ M}^{-1}\text{cm}^{-1}$ ) in 50 mM  
16 HEPES buffer (2 mL, pH 7.2, 100 mM NaCl) was mixed with  $\text{ZnCl}_2$  (4 equiv.) to give a stock  
17 solution of **3** (200  $\mu$ M), which was used for ITC titration experiments.

18

## 1 Synthesis of 4

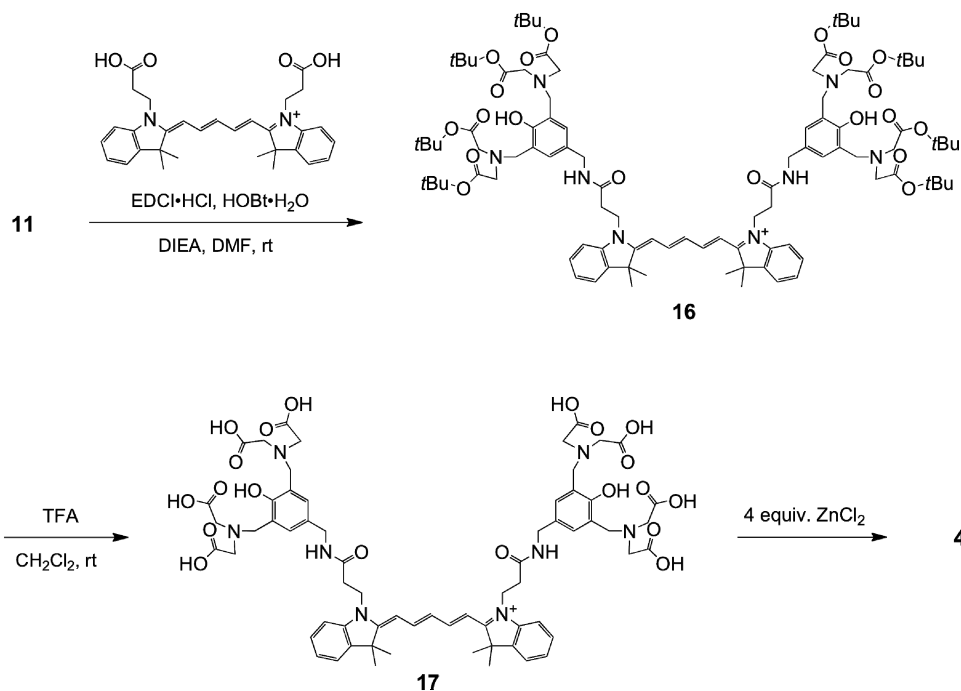

2

## 3 Compound 16

4 A solution of Cy5-bisCO<sub>2</sub>H<sup>S3</sup> (21 mg, 39 μmol), **11** (55 mg, 86 μmol), EDCl·HCl (11 mg,  
5 55 μmol), HOBT·H<sub>2</sub>O (8 mg, 55 μmol) and DIEA (27 μL, 155 μmol) in dry DMF (3 mL) was  
6 stirred for 15 h at rt. After removal of the solvent by evaporation, the residue was purified by  
7 RP-HPLC (column: YMC-pack ODS-A, 250 x 25 mm, mobile phase; CH<sub>3</sub>CN (containing 0.1%  
8 TFA) : H<sub>2</sub>O (containing 0.1% TFA) = 50 : 50 (0 min) → 90 : 10 (40 min), flow rate; 10  
9 mL/min, detection; UV (220 nm)) to give **16** (27 mg, 37%) as a deep blue powder. <sup>1</sup>H-NMR  
10 (400 MHz, CDCl<sub>3</sub>) δ 8.13 (s, 2H), 7.87 (t, *J* = 12.8 Hz, 2H), 7.29-7.38 (m, 8H), 7.19 (s, 4H),  
11 6.61 (t, *J* = 12.4 Hz, 1H), 6.26 (t, *J* = 13.2 Hz, 2H), 4.37 (t, *J* = 7.2 Hz, 4H), 4.29 (d, *J* = 5.6 Hz,  
12 4H), 4.25 (s, 8H), 3.72 (s, 16H), 2.78 (t, *J* = 7.6 Hz, 4H), 1.65 (s, 12H), 1.46 (s, 72H).  
13 HR-ESI MS *m/e* calcd for [M]<sup>+</sup> 1738.0257, found 1738.0252.

14

## 15 Compound 17

16 A solution of **16** (20 mg, 11 μmol) in CH<sub>2</sub>Cl<sub>2</sub> (1 mL) / TFA (1 mL) was stirred for 6 h at rt.

1 After removal of the solvent by evaporation, the residue was purified by RP-HPLC (column:  
2 YMC-pack ODS-A, 250 x 25 mm, mobile phase; CH<sub>3</sub>CN (containing 0.1% TFA) : H<sub>2</sub>O  
3 (containing 0.1% TFA) = 20 : 80 (0 min) → 50 : 50 (40 min), flow rate; 10 mL/min, detection;  
4 UV (220 nm)) to give **17** (11 mg, 73%) as a deep blue powder. <sup>1</sup>H-NMR (400 MHz, CD<sub>3</sub>OD)  
5 δ 8.21 (t, *J* = 12.8 Hz, 2H), 7.47 (d, *J* = 7.2 Hz, 2H), 7.39 (t, *J* = 7.6 Hz, 2H), 7.31 (d, *J* = 7.6 Hz,  
6 2H), 7.26 (t, *J* = 7.2 Hz, 2H), 7.10 (s, 4H), 6.54 (t, *J* = 12.0 Hz, 1H), 6.32 (d, *J* = 13.6 Hz, 2H),  
7 4.41 (t, *J* = 7.2 Hz, 4H), 4.22 (s, 8H), 4.19 (s, 4H), 3.76 (s, 16H), 2.72 (t, *J* = 6.8 Hz, 4H), 1.67  
8 (s, 12H). HR-ESI MS *m/e* calcd for [M]<sup>+</sup> 1289.5249, found 1289.5182.

9

#### 10 Compound **4**

11 Compound **4** was dissolved in DMSO. The concentration of **4** was determined based  
12 on the UV absorbance at 647 nm using the extinction coefficient of Cy5 ( $\epsilon_{647 \text{ nm}} = 250,000$   
13  $\text{M}^{-1}\text{cm}^{-1}$ ).<sup>S3</sup> The solution was mixed with 4 equiv of ZnCl<sub>2</sub> (100 mM in H<sub>2</sub>O) to give a stock  
14 solution of **4** (1.0 mM), which was stored in a refrigerator (- 30 °C) and thawed before use.

## 1 Synthesis of 5-2M(II) (M = Zn, Ni)

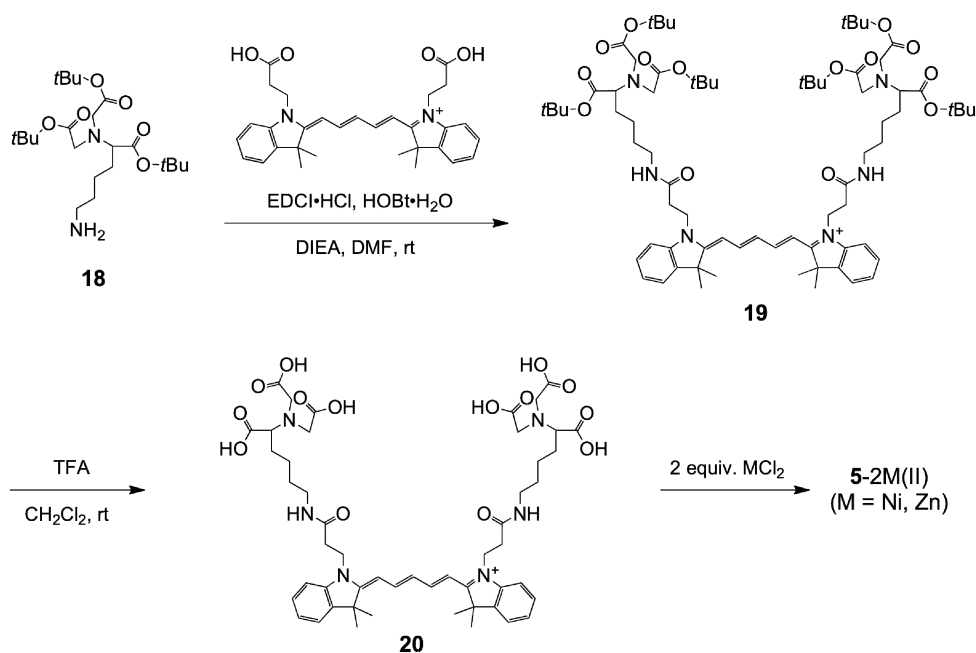

2

### 3 Compound **19**

4 A solution of **18**<sup>S4</sup> (60 mg, 140  $\mu\text{mol}$ ), Cy5-bisCO<sub>2</sub>H (30 mg, 56  $\mu\text{mol}$ ), EDCI·HCl (30  
5 mg, 157  $\mu\text{mol}$ ), HOBt·H<sub>2</sub>O (24 mg, 157  $\mu\text{mol}$ ) and DIEA (38  $\mu\text{L}$ , 218  $\mu\text{mol}$ ) in dry DMF (2  
6 mL) was stirred for 13 h at rt. After removal of the solvent by evaporation, the residue was  
7 diluted with CHCl<sub>3</sub>. The organic layer was washed with brine followed by drying over  
8 Na<sub>2</sub>SO<sub>4</sub>. After removal of the solvent by evaporation, the residue was purified by flash  
9 column chromatography on SiO<sub>2</sub> (CHCl<sub>3</sub> : MeOH : 25% aqueous NH<sub>3</sub> = 400 : 40 : 1) to give **19**  
10 (77 mg, quant.) as a deep blue oil. <sup>1</sup>H-NMR (400 MHz, CDCl<sub>3</sub>)  $\delta$  7.96 (t, *J* = 13.2 Hz, 2H),  
11 7.31-7.40 (m, 6H), 7.19-7.23 (m, 2H), 6.95 (t, *J* = 12.4 Hz, 1H), 6.52 (d, *J* = 13.2 Hz, 2H), 4.42  
12 (t, *J* = 7.6 Hz, 4H), 3.72 (d, *J* = 6.8 Hz, 2H), 3.43-3.49 (m, 8H), 3.18-3.29 (m, 4H), 2.83 (t, *J* =  
13 7.6 Hz, 4H), 1.68 (s, 12H), 1.54-1.73 (m, 12H), 1.45 (s, 18H), 1.42 (s, 36H). HR-ESI MS  
14 *m/e* calcd for [M]<sup>+</sup> 1323.8466, found 1323.8460.

15

### 16 Compound **20**

17 A solution of **19** (42 mg, 31  $\mu\text{mol}$ ) in CH<sub>2</sub>Cl<sub>2</sub> (1 mL) / TFA (1 mL) was stirred for 12 h at

1 rt. After removal of the solvent by evaporation, the residue was purified by RP-HPLC  
2 (column: YMC-pack ODS-A, 250 x 25 mm, mobile phase; CH<sub>3</sub>CN (containing 0.1% TFA) :  
3 H<sub>2</sub>O (containing 0.1% TFA) = 20 : 80 (0 min) → 50 : 50 (40 min), flow rate; 10 mL/min,  
4 detection; UV (220 nm)) to give **20** (19 mg, 56%) as a deep blue powder. <sup>1</sup>H-NMR (400  
5 MHz, CD<sub>3</sub>OD) δ 8.24 (t, *J* = 12.8 Hz, 2H), 7.48 (d, *J* = 7.6 Hz, 2H), 7.40 (t, *J* = 7.2 Hz, 2H),  
6 7.32 (d, *J* = 7.6 Hz, 2H), 7.26 (t, *J* = 7.6 Hz, 2H), 6.63 (t, *J* = 12.4 Hz, 1H), 6.35 (d, *J* = 13.6 Hz,  
7 2H), 4.40 (t, *J* = 6.0 Hz, 4H), 3.62 (d, *J* = 8.8 Hz, 8H), 3.40 (t, *J* = 7.2 Hz, 2H), 3.10 (br s, 4H),  
8 2.67 (t, *J* = 6.0 Hz, 4H), 1.72 (s, 12H), 1.28-1.39 (m, 12H). HR-ESI MS *m/e* calcd for [M]<sup>+</sup>  
9 987.4710, found 987.4734.

10

11 Compound **5-2M(II)**

12 Compound **20** was dissolved in DMSO. The concentration of **20** was determined based  
13 on the UV absorbance at 647 nm. The solution was mixed with 2 equiv of NiCl<sub>2</sub> and ZnCl<sub>2</sub>  
14 (100 mM in H<sub>2</sub>O) to give a stock solution of **5-2Ni(II)** and **5-2Zn(II)** (1.0 mM), respectively.  
15 The stock solution was stored in a refrigerator (- 30 °C) and thawed before use.

16

## 1 Synthesis of 6

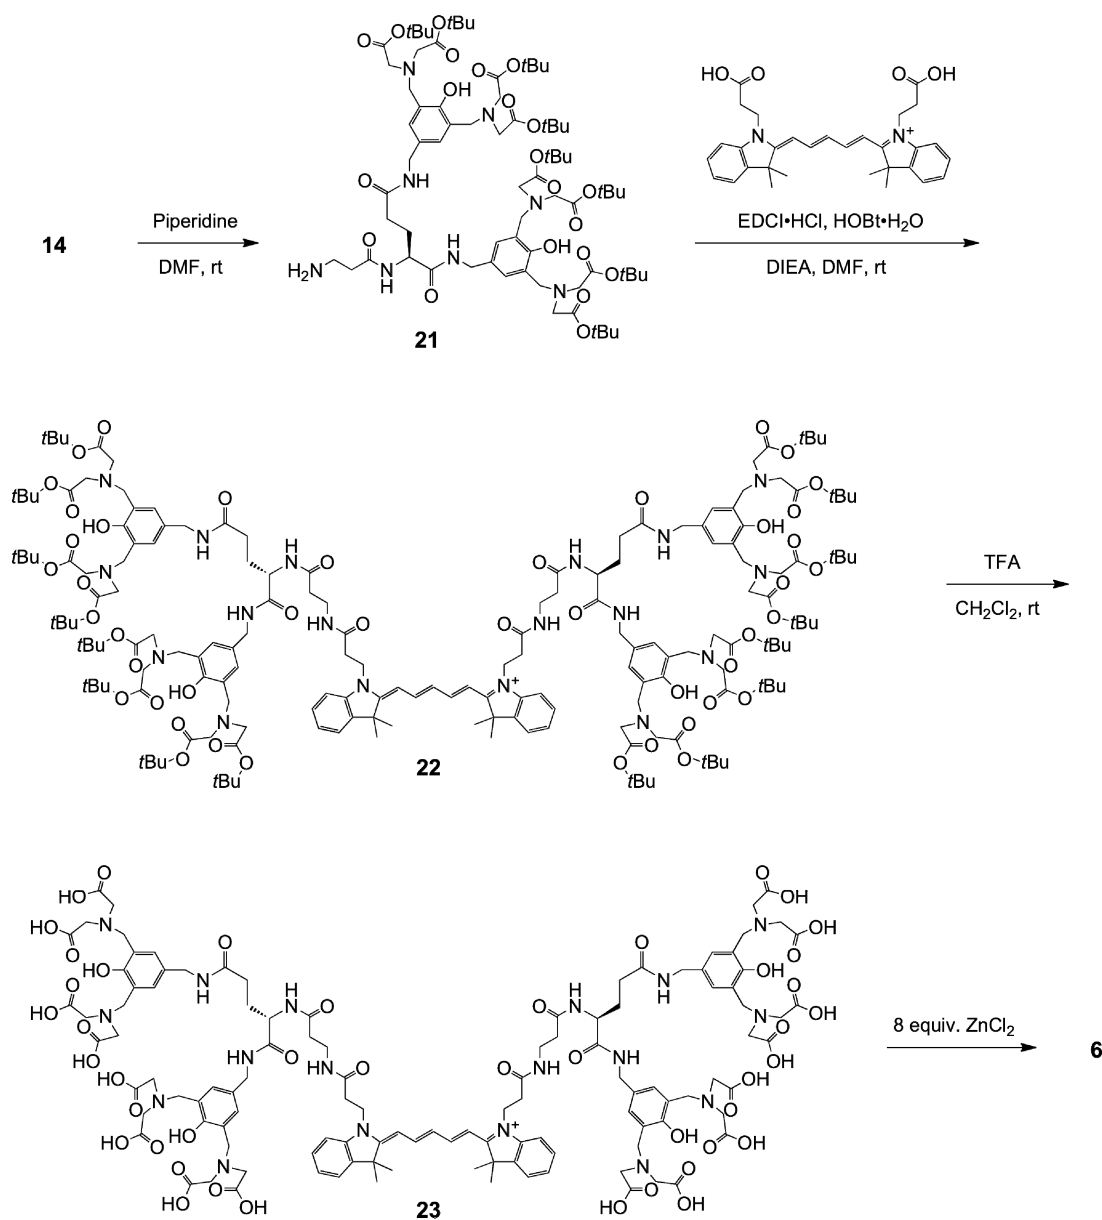

2

3

### 4 Compound 21

5 A solution of **14** (88 mg, 52  $\mu\text{mol}$ ) in DMF (2 mL) / piperidine (0.2 mL) was stirred for  
6 30 min at rt. After removal of the solvent by evaporation, the residue was dissolved in  
7 *n*-hexane. The precipitate was collected and dried in vacuo to yield **21** (45 mg, 59%) as a  
8 yellow amorphous powder.  $^1\text{H-NMR}$  (400 MHz,  $\text{CD}_3\text{OD}$ )  $\delta$  9.56 (br s, 2H), 7.86 (s, 1H),

1 7.84 (s, 1H), 7.08 (s, 2H), 7.06 (s, 2H), 6.40 (br s, 1H), 4.18-4.52 (m, 5H), 3.91 (s, 4H), 3.89 (s,  
2 4H), 3.41 (s, 8H), 3.40 (s, 8H), 2.91-3.03 (m, 2H), 2.30-2.41 (m, 4H), 2.07-2.26 (m, 2H), 1.46 (s,  
3 72H). HR-ESI MS  $m/e$  calcd for  $[M+H]^+$  1457.8641, found 1457.8622.

4

#### 5 Compound **23**

6 A solution of **21** (31 mg, 21  $\mu$ mol), Cy5-bisCO<sub>2</sub>H (5 mg, 9.3  $\mu$ mol), EDCI•HCl (5 mg, 26  
7  $\mu$ mol), HOBt•H<sub>2</sub>O (4 mg, 26  $\mu$ mol) and DIEA (6  $\mu$ L, 37  $\mu$ mol) in dry DMF (2 mL) was stirred  
8 for 22 h at rt. After removal of the solvent by evaporation, the residue was diluted with  
9 AcOEt. The organic layer was washed with 2.5% NH<sub>3</sub>aq and brine followed by drying over  
10 Na<sub>2</sub>SO<sub>4</sub>, and concentrated by evaporation. The residue was purified by RP-HPLC (column:  
11 YMC-pack ODS-A, 250 x 25 mm, mobile phase; CH<sub>3</sub>CN (containing 0.1% TFA) : H<sub>2</sub>O  
12 (containing 0.1% TFA) = 50 : 50 (0 min) → 90 : 10 (40 min), flow rate; 10 mL/min, detection;  
13 UV (220 nm)) to give **22** (20 mg) as a deep blue powder.

14 A solution of **22** (20 mg, 5.7  $\mu$ mol) in CH<sub>2</sub>Cl<sub>2</sub> (1 mL) / TFA (1 mL) was stirred for 6 h at  
15 rt. After removal of the solvent in vacuo, the crude residue was purified by RP-HPLC  
16 (column: YMC-pack ODS-A, 250 x 25 mm, mobile phase; CH<sub>3</sub>CN (containing 0.1% TFA) :  
17 H<sub>2</sub>O (containing 0.1% TFA) = 20 : 80 (0 min) → 40 : 60 (40 min), flow rate; 10 mL/min,  
18 detection; UV (220 nm)) to give **23** (5.1 mg, 21% in 2 steps) as a deep blue powder.  
19 <sup>1</sup>H-NMR (400 MHz, CD<sub>3</sub>OD)  $\delta$  8.22 (t,  $J$  = 13.2 Hz, 2H), 7.47 (d,  $J$  = 7.6 Hz, 2H), 7.38 (t,  $J$  =  
20 7.6 Hz, 2H), 7.30 (d,  $J$  = 7.6 Hz, 2H), 7.25 (t,  $J$  = 7.6 Hz, 2H), 7.18 (s, 4H), 7.16 (s, 4H), 6.58 (t,  
21  $J$  = 12.0 Hz, 1H), 6.31 (d,  $J$  = 13.2 Hz, 2H), 4.31-4.34 (m, 10H), 4.20-4.25 (m, 20H), 3.79 (s,  
22 32H), 3.41 (q,  $J$  = 3.6 Hz, 4H), 2.65 (t,  $J$  = 6.8 Hz, 4H), 2.42 (q,  $J$  = 4.4 Hz, 4H), 2.35 (t,  $J$  =  
23 6.8 Hz, 4H), 2.12-2.17 (m, 2H), 1.92-1.98 (m, 2H), 1.69 (s, 12H). HR-MALDI-TOF MS  $m/e$   
24 calcd for  $[M]^+$  2479.9500, found 2479.9553.

25

#### 26 Compound **6**



1           Compound **23** was dissolved in DMSO.   The concentration of **23** was determined based  
2   on the UV absorbance at 647 nm.   The solution was mixed with 8 equiv of ZnCl<sub>2</sub> (100 mM in  
3   H<sub>2</sub>O) to give a stock solution of **6** (1.0 mM), which was stored in a refrigerator (- 30 °C) and  
4   thawed before use.  
5

## 1 Synthesis of 28

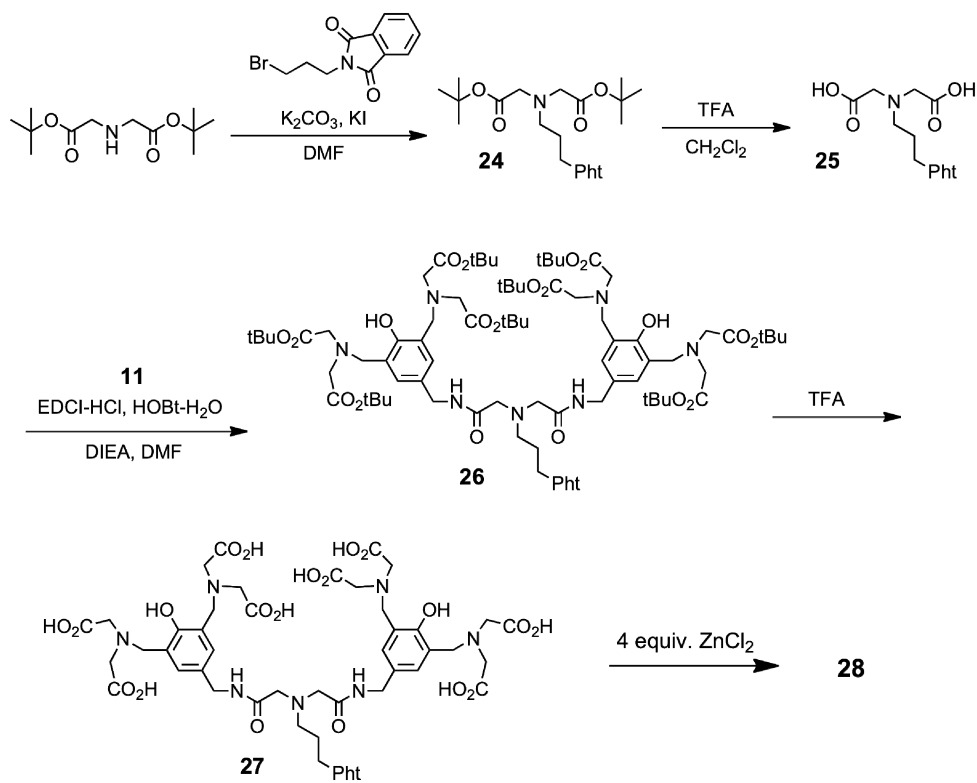

2

## 3 Compound 24

4 A solution of di-*tert*-butyl iminodiacetate (587 mg, 2.39 mmol), 3-bromopropyl  
5 phthalimide (706 mg, 2.63 mmol), potassium carbonate (363 mg, 2.63 mmol) and potassium  
6 iodide (159 mg, 0.956 mmol) in dry DMF (10 mL) was stirred overnight at 50 °C. After  
7 removal of the solvent by evaporation, the residue was diluted with  $CHCl_3$ . The organic layer  
8 was washed with *sat.*  $NaHCO_3$  and brine followed by drying over  $Na_2SO_4$ . After removal of  
9 the solvent by evaporation, the residue was purified by flash column chromatography on  $SiO_2$   
10 (Hexane : AcOEt = 4 : 1) to give 24 (347 mg, 34%) as a yellow oil.  $^1H$ -NMR (400 MHz,  
11  $CDCl_3$ )  $\delta$  7.83 (dd,  $J = 5.6, 3.2$  Hz, 2H), 7.70 (dd,  $J = 5.6, 2.8$  Hz, 2H), 3.77 (t,  $J = 7.2$  Hz, 2H),  
12 3.44 (s, 4H), 2.79 (t,  $J = 7.2$  Hz, 2H), 1.85 (q,  $J = 7.2$  Hz, 2H), 1.44 (s, 18H).

13

## 14 Compound 25

1 A solution of **24** (347 mg, 0.802 mmol) in CH<sub>2</sub>Cl<sub>2</sub> (2 mL) / TFA (2 mL) was stirred for 13  
2 h at rt. After removal of the solvent by evaporation, the residue was dissolved in H<sub>2</sub>O. The  
3 aqueous solution was neutralized with 25% aqueous NH<sub>3</sub> and washed with AcOEt, then  
4 acidified with 1 N aqueous HCl to precipitate the white solid. The solid was filtered and  
5 dried in vacuo to give **25** (142 mg, 50%). <sup>1</sup>H-NMR (400 MHz, DMSO-d<sub>6</sub>) δ 7.80-7.85 (m,  
6 4H), 3.59 (t, *J* = 7.2 Hz, 2H), 2.67 (t, *J* = 7.2 Hz, 2H), 1.69 (q, *J* = 7.2 Hz, 2H).

7

#### 8 Compound **26**

9 A solution of **25** (100 mg, 280 μmol), **11** (375 mg, 589 μmol), EDCI•HCl (152 mg, 793  
10 μmol), HOBT•H<sub>2</sub>O (121 mg, 793 μmol) and DIEA (189 μL, 1.12 mmol) in dry DMF (5 mL) was  
11 stirred for 3 h at 50 °C. After removal of the solvent by evaporation, the residue was  
12 dissolved in CHCl<sub>3</sub>. The organic layer was washed with *sat.* NaHCO<sub>3</sub> and brine followed by  
13 drying over Na<sub>2</sub>SO<sub>4</sub>. After removal of the solvent by evaporation, the residue was purified by  
14 flash column chromatography on SiO<sub>2</sub> (Hexane : AcOEt = 1 : 1 → 1 : 2) to give **26** (250 mg,  
15 57%) as a white amorphous powder. <sup>1</sup>H-NMR (400 MHz, CDCl<sub>3</sub>) δ 9.53 (s, 2H), 7.79  
16 (dd, *J* = 5.6, 2.8 Hz, 2H), 7.69 (dd, *J* = 5.2, 3.2 Hz, 2H), 7.11 (t, *J* = 5.2 Hz, 2H), 7.07 (s, 4H),  
17 4.32 (d, *J* = 5.6 Hz, 4H), 3.89 (s, 8H), 3.65 (t, *J* = 6.8 Hz, 2H), 3.39 (s, 16H), 3.28 (s, 4H), 2.73  
18 (t, *J* = 6.8 Hz, 2H), 1.83 (q, *J* = 7.2 Hz, 2H), 1.45 (s, 72H).

19

#### 20 Compound **27**

21 A solution of **26** (58 mg, 37 μmol) in TFA (3 mL) was stirred for 13 h at rt. After  
22 removal of the solvent by evaporation, the residue was washed with di-isopropylether, then  
23 filtered and dried in vacuo to give **28** (35 mg, 55%) as a pale-purple solid. <sup>1</sup>H-NMR (400  
24 MHz, CD<sub>3</sub>OD) δ 7.79-7.87 (m, 4H), 7.22 (s, 4H), 4.31 (s, 4H), 4.29 (s, 8H), 3.84 (s, 4H), 3.82 (s,  
25 16H), 3.70 (t, *J* = 6.8 Hz, 2H), 3.16 (t, *J* = 7.6 Hz, 2H), 2.00 (q, *J* = 7.2 Hz, 2H).

26

1 Compound **28**

2 A solution of **27** (1 mM, determined by  $\epsilon(\mathbf{27})_{299\text{ nm}} = 5.00 \times 10^3 \text{ M}^{-1}\text{cm}^{-1}$ ) in 50 mM  
3 HEPES buffer (pH 7.2, 100 mM NaCl) was mixed with  $\text{ZnCl}_2$  (4 equiv.) to prepare a stock  
4 solution of **28** (1 mM) and evaluate the binding affinity for His10-peptide by ITC measurement  
5 to afford  $2.8 \times 10^6 \text{ M}^{-1}$  (data not shown).

6

1 **Syntheses of Ac-WA(H)<sub>n</sub>-NH<sub>2</sub> (n = 6 (His6) or 10 (His10)) peptide**

2 For the synthesis of His6 peptide, the solid-phase synthesis was carried out using Rink  
3 Amide resin (Novabiochem). The coupling reactions (0.1 mmol scale) were performed with a  
4 mixture of the corresponding carboxylic acid (3 eq.), HBTU (3 eq.), HOBT•H<sub>2</sub>O (3 eq.), and  
5 DIEA (6 eq.) in *N*-methylmorpholine (NMP). Fmoc deprotection was performed with 20%  
6 piperidine in NMP. All coupling and deprotection steps were monitored by Kaiser test. The  
7 cleavage from the resin was performed with TFA containing 2.5% TIS and 2.5% H<sub>2</sub>O. The  
8 crude peptide product was purified by RP-HPLC to give His6 peptide (9 mg, 8%) as  
9 hygroscopic viscous oil. MALDI-TOF MS *m/e* calcd for [M+H]<sup>+</sup> 1139.51, found 1140.59.

10 His10 peptide was synthesized by the same procedure described above. The crude  
11 peptide was purified by RP-HPLC to give His10 peptide (5 mg, 3%) as hygroscopic viscous oil.  
12 MALDI-TOF MS *m/e* calcd for [M+H]<sup>+</sup> 1687.75, found 1687.31.

13  
14  
15  
16

1    **General materials and methods for biochemical/biological experiments**

2       Unless otherwise noted, all proteins/enzymes and biochemical reagents were obtained from  
3 commercial suppliers (Sigma, Aldrich, Tokyo Chemical Industry (TCI), Wako Pure Chemical  
4 Industries, Pierce Biotechnology, or Calbiochem) and used without further purification.  
5 UV-visible spectra and fluorescence spectra were recorded on a UV-2550 spectrophotometer  
6 (Shimadzu) and LS55 (Perkin Elmer), respectively. SDS-polyacrylamide gel electrophoresis  
7 (SDS-PAGE) was carried out using a Bio-Rad Mini-Protean III electrophoresis apparatus. Cell  
8 imaging was performed using a confocal laser scanning microscope (CLSM, Olympus, FV1000,  
9 IX81) equipped with a 60× objective lens. Fluorescence images were acquired using the 488 nm  
10 line of an argon laser for excitation of EGFP (emission, 500-530 nm) and the 633 nm line of a  
11 HeNe Red laser for excitation of Cy5 (emission, 645-745 nm).

12

# 1 Construction of GPCR expression plasmids

2

## 3 His10-EGFP-B2R plasmid

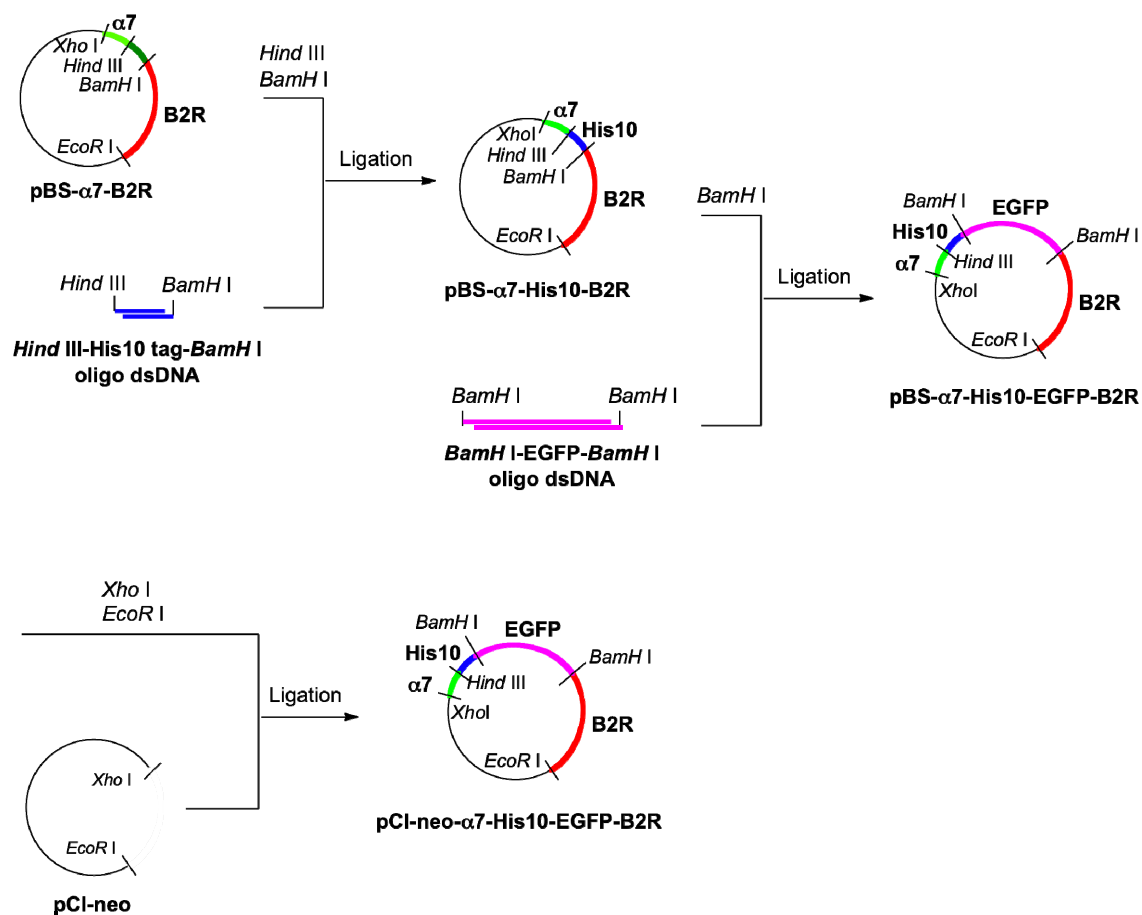

4

5

6 The oligo DNA fragments coding His10 tag were inserted into *Hind* III-*Bam* H I site of  
7 pBluescript II SK(-) (pBS, Stratagene) coding *N*-terminal of α7 nicotinic acetylcholine  
8 receptor(α7)-B2R to yield pBS-α7-His10-B2R. The sequences of the 5'-phosphorylated  
9 DNA fragments were as follows: 5'-AGC TTG CAT CAC CAT CAC CAT CAC CAT CAC  
10 CAT CAC GCT AGG GGC TCT GGC TCG-3'(forward) and 5'-GAT CCG AGC CAG AGC  
11 CCC TAG CGT GAT GGT GAT GGT GAT GGT GAT GGT GAT GCA-3'(backward).

12 The dsDNA fragment coding *Bam* H I-EGFP-*Bam* H I was inserted into *Bam* H I site of  
13 pBS-α7-His10-B2R to yield pBS-α7-His10-EGFP-B2R.

1 A *Xho* I-*Eco*R I fragment of pBS- $\alpha$ 7-His10-EGFP-B2R was inserted into the *Xho* I-*Eco*R  
2 I digestion site of pCI-neo plasmid (Promega). The plasmid purification using Qiagen  
3 Plasmid Maxi kit (Qiagen) yielded pCI-neo- $\alpha$ 7-His10-EGFP-B2R, which was used for protein  
4 expression in mammalian cells.

5

## 6 GSGS-EGFP-B2R plasmid

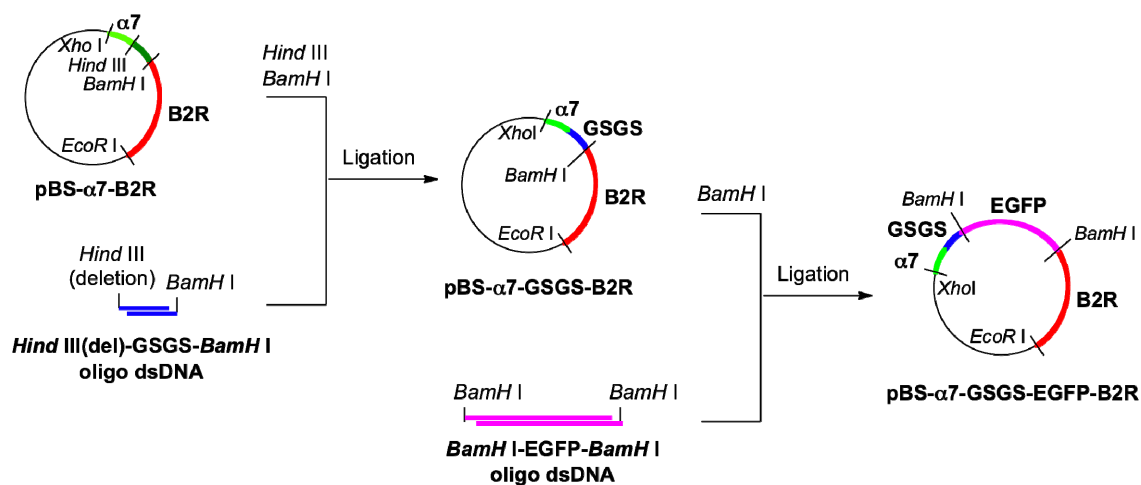

7

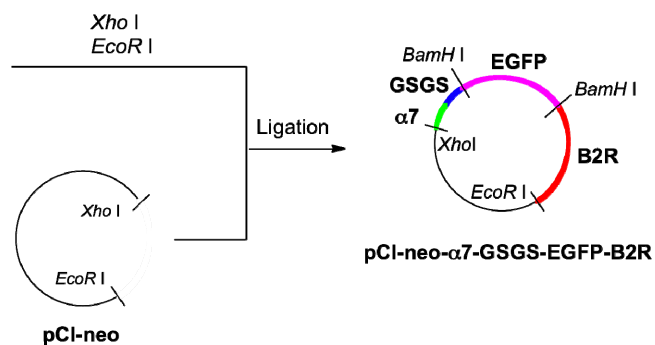

8

9 An oligo DNA fragments coding a mock tag (GSGS) were inserted into *Hind* III-*Bam*H I  
10 site to yield pBS- $\alpha$ 7-GSGS-B2R. The sequences of the 5'-phosphorylated DNA fragments  
11 were as follows: 5'-AGC TCA GGC TCT GGC TCG-3'(forward) and 5'-GAT CCG AGC CAG  
12 AGC CTG-3'(backward).



1 The dsDNA fragment coding *BamH* I-EGFP-*BamH* I was inserted into *BamH* I site of  
2 pBS- $\alpha$ 7-GSGS-B2R to yield pBS- $\alpha$ 7-GSGS-EGFP-B2R. This plasmid was placed into  
3 pCI-neo and purified by Qiagen Plasmid Maxi kit (Qiagen) to give  
4 pCI-neo- $\alpha$ 7-GSGS-EGFP-B2R.

5

#### 6 **His10-EGFP-m1AchR plasmid**

7 The dsDNA fragment coding *BamH* I-m1AchR-*EcoR* I obtained from  
8 pCI-neo-D4x3-m1AchR<sup>S5</sup> was inserted into *BamH* I-*EcoR* I site of pBS- $\alpha$ 7-His10-B2R to yield  
9 pBS- $\alpha$ 7-His10-m1AchR.

10 The dsDNA fragment coding *BamH* I-EGFP-*BamH* I was inserted into *BamH* I site of  
11 pBS- $\alpha$ 7-His10-m1AchR to yield pBS- $\alpha$ 7-His10-EGFP-m1AchR. This plasmid was placed  
12 into pCI-neo and purified by by Qiagen Plasmid Maxi kit (Qiagen) to give  
13 pCI-neo- $\alpha$ 7-His10-EGFP-m1AchR.

14

#### 15 **GSGS-EGFP-m1AchR plasmid**

16 The oligo DNA fragments coding a mock tag (GSGS) were inserted into *Hind* III-*BamH* I  
17 site of pBS- $\alpha$ 7-His10-m1AchR to yield pBS- $\alpha$ 7-GSGS-m1AchR.

18 The dsDNA fragment coding *BamH* I-EGFP-*BamH* I was inserted into *BamH* I site to  
19 yield pBS- $\alpha$ 7-GSGS-EGFP-m1AchR. This plasmid was placed into pCI-neo and purified by  
20 the same procedure to give pCI-neo- $\alpha$ 7-GSGS-EGFP-m1AchR.

21

## 1 Plasmid construction and protein expression of EGFP

2

### 3 Construction of His10-thrombin-EGFP plasmid

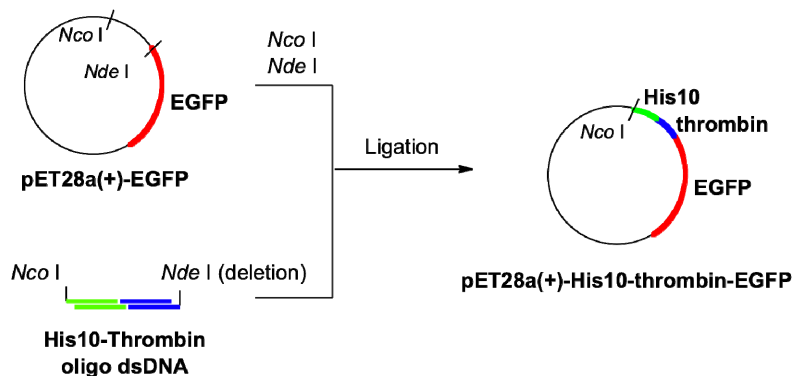

4

5

6 The oligo DNA fragments coding His10-thrombin (-HHHHHHHHHHSSGLVPRGS-)

7 were inserted into *Nco* I-*Nde* I site of pET28a(+) vector (Novagen) subcloned with EGFP to

8 yield pET28a(+)-His10-thrombin-EGFP. The sequences of the 5'-phosphorylated DNA

9 fragments were as follows: 5'-CAT GGG CAG CAG CCA TCA TCA TCA TCA TCA TCA

10 TCA TCA TCA TAG CAG CGG CCT GGT GCC GCG CGG CAG CGG-3' (forward) and

11 5'-TAC CGC TGC CGC GCG GCA CCA GGC CGC TGC TAT GAT GAT GAT GAT GAT

12 GAT GAT GAT GAT GGC TGC TGC C-3' (backward).

13

### 14 Expression of His10-EGFP and EGFP lacking His-tag

15 pET28a(+)-His10-thrombin-EGFP vector was transformed into *E. coli* BL21(DE3) pLysS.

16 The cells were grown in 500 mL of LB medium at 37 °C until an optical density (OD) at 600

17 nm increased to 0.6, and further grown at 16 °C overnight with IPTG induction (0.3 mM).

18 The cells were spun down for 10 min at 3500 rpm, and re-suspended in 25 mL HEPES buffer

19 (50 mM, pH 7.2). The collected cells were re-suspended in 25 mL HEPES buffer and lysed

20 by sonication (10 shots x 20 times). Insoluble materials were removed by centrifugation

21 (12,000 rpm, 10 min x 2) to collect the soluble fraction containing the EGFP fused with

1 His10-tag. The soluble fraction was passed through a plastic column filled with 2 mL of  
2 TALON resin (1 mL, Clontech). After washing with the HEPES buffer, the resin-bound  
3 protein was eluted with HEPES buffer (50 mM, pH 7.2) containing 150 mM imidazole. The  
4 fractions containing His10-EGFP (confirmed by SDS-PAGE) was dialyzed twice against  
5 HEPES buffer (50 mM, pH 7.2, 100 mM NaCl) to remove the excess imidazole to give  
6 His10-EGFP solution (32  $\mu$ M, 3 mL).

7 A solution of His10-EGFP in HEPES buffer (15  $\mu$ M, 1 mL) was mixed with thrombin (5  
8 U), and the mixture was incubated for 16 h at 22 °C. After removal of the thrombin by  
9 incubation with benzamidine sepharose 6B, elute was dialyzed twice against HEPES buffer (50  
10 mM, pH 7.2, 100 mM NaCl) to remove His10 peptide fragment to give EGFP lacking His-tag  
11 (12  $\mu$ M, 1 mL). The cleavage of the His-tag site by thrombin was confirmed by SDS-PAGE.

12

1 **Isothermal titration calorimetry (ITC) measurement**

2 ITC titration was performed with Isothermal Titration Calorimeter (MicroCal Inc). All  
3 measurements were conducted at 298 K. A solution of metal complex in a buffer solution (50  
4 mM HEPES, 100 mM NaCl, pH 7.2) was injected stepwise (10  $\mu$ L x 24 times) to a solution of  
5 the His6 or His10 peptide in the same solvent system. The measured heat flow was recorded  
6 as function of time and converted into enthalpies ( $\Delta H$ ) by integration of the appropriate reaction  
7 peaks. Dilution effects were corrected by subtracting the result of a control experiment with  
8 an injection of the metal complexes into the blank HEPES buffer under identical experimental  
9 conditions. The binding parameters ( $K_{app}$ ,  $\Delta H$ ,  $\Delta S$ ,  $n$ ) were evaluated by applying one site  
10 model using the software Origin (MicroCal Inc).

11

## 1   **References**

- 2   S1. The apparent binding constant obtained by the competitive titration was  $2.8 \times 10^7 \text{ M}^{-1}$ .  
3       The value was further analyzed based on the competitive binding equation described in our  
4       previous work; A. Ojida, S. Fujishima, K. Honda, H. Nonaka, S. Uchinomiya and I.  
5       Hamachi, *Chem. Asian J.*, 2010, **5**, 877-886.
- 6   S2. A. Johansson, M. Abrahamsson, A. Magnuson, P. Huang, J. Mårtensson, S. Styring, L.  
7       Hammarström, L. Sun and B. Åkermark, *Inorg. Chem.*, 2003, **42**, 7502-7511.
- 8   S3. M. A. Brun, K.-T. Tan, E. Nakata, M. J. Hinner and K. Johnsson, *J. Am. Chem. Soc.*, 2009,  
9       **131**, 5873-5884.
- 10  S4. W. M. Hussein, B. P. Ross, M. J. Landsberg, D. Lévy, B. Hankamer and R. P. McGeary, *J.*  
11       *Org. Chem.*, 2009, **74**, 1473-1479.
- 12  S5. A. Ojida, K. Honda, D. Shinmi, S. Kiyonaka, Y. Mori and I. Hamachi, *J. Am. Chem. Soc.*,  
13       2006, **128**, 10452-10459
